# Supplementary material
Source: bioRxiv or medRxiv preprint supplement (https://www.medrxiv.org/highwire/filestream/73060/field_highwire_adjunct_files/4/2020.03.05.20031500-5.pdf)
Supplement: Supplementary file [file 2020.03.05.20031500-5.pdf]

**Table S1.** Baseline demographics and disease characteristics of VANCE study.

|                                   | Radical prostatectomy arms   |                                 | Active surveillance arms        |
|-----------------------------------|------------------------------|---------------------------------|---------------------------------|
|                                   | Standard vaccination regimen | Accelerated vaccination regimen | Accelerated vaccination regimen |
| <b>Number of patients (n)</b>     | 11                           | 16                              | 13                              |
| <b>Median age / range (years)</b> | 63 / 53-73                   | 58 / 50-75                      | 69 / 53-77                      |
| <b>Gleason score (n)</b>          |                              |                                 |                                 |
| >6                                | 0                            | 1                               | 10                              |
| <i>High volume 6</i>              | 0                            | 1                               | 1                               |
| 3+4                               | 8                            | 11                              | 2                               |
| 4+3                               | 3                            | 3                               | 0                               |
| <b>Clinical stage (n)</b>         |                              |                                 |                                 |
| $\geq T1c$                        | 3                            | 2                               | 13                              |
| <i>T2a</i>                        | 2                            | 7                               | 0                               |
| <i>T2b</i>                        | 6                            | 7                               | 0                               |
